# Supplementary material for: Micro-encapsulation of rare earth metal ion-doped magnesia-based alginate/pectin hybrid polymeric composites for defluoridation of water
Source: Royal Society of Chemistry journal article supplement (doi:10.1039/d3re00283g), 2023-01-01
Supplement: d3re00283g1.pdf [file d3re00283g1.pdf]

## Supplementary Material

### **Micro-encapsulation of rare earth metal ions doped magnesia based alginate/pectin hybrid polymeric composites for defluoridation of water**

Antonysamy Jeyaseelan<sup>a</sup>, Natrayasamy Viswanathan<sup>a\*</sup>, Ilango Aswin Kumar<sup>b</sup>,

Mohammad Rafe Hatshan<sup>c</sup>

<sup>a</sup>Department of Chemistry, Anna University, University College of Engineering - Dindigul, Reddiyarchatram, Dindigul - 624 622, Tamilnadu, India.

<sup>b</sup>Department of Environmental and Sustainable Engineering, University at Albany, State University of New York, Albany, New York 12222, United States.

<sup>c</sup>Department of Chemistry, College of Science, King Saud University, P.O. Box 2455, Riyadh 11451, Saudi Arabia

\* Corresponding author. Tel.: +91-451-2554066; fax: +91-451-2554066.

E-mail address: drnviswanathan@gmail.com (N.Viswanathan)

**Table S1.** Kinetic studies of PAML composite for fluoride adsorption.

| Kinetic models           | Parameters                        | 303 K  |         |         |         | 313 K  |         |         |         | 323 K  |         |         |         |
|--------------------------|-----------------------------------|--------|---------|---------|---------|--------|---------|---------|---------|--------|---------|---------|---------|
|                          |                                   | 8 mg/L | 10 mg/L | 12 mg/L | 14 mg/L | 8 mg/L | 10 mg/L | 12 mg/L | 14 mg/L | 8 mg/L | 10 mg/L | 12 mg/L | 14 mg/L |
| Pseudo-first-order       | $k_{ad}$ ( $\text{min}^{-1}$ )    | 0.487  | 0.493   | 0.499   | 0.504   | 0.491  | 0.496   | 0.502   | 0.507   | 0.493  | 0.500   | 0.505   | 0.511   |
|                          | r                                 | 0.762  | 0.769   | 0.776   | 0.781   | 0.768  | 0.774   | 0.780   | 0.786   | 0.772  | 0.777   | 0.784   | 0.791   |
|                          | sd                                | 0.298  | 0.303   | 0.309   | 0.316   | 0.302  | 0.307   | 0.313   | 0.321   | 0.306  | 0.312   | 0.318   | 0.326   |
| Pseudo-second-order      | $q_e$ (mg/g)                      | 4.515  | 4.521   | 4.527   | 4.531   | 4.519  | 4.526   | 4.530   | 4.536   | 4.523  | 4.528   | 4.534   | 4.542   |
|                          | k ( $\text{g/mg min}^{-1}$ )      | 0.304  | 0.310   | 0.314   | 0.319   | 0.309  | 0.312   | 0.318   | 0.322   | 0.311  | 0.317   | 0.320   | 0.327   |
|                          | h ( $\text{mg/g min}^{-1}$ )      | 3.004  | 3.009   | 3.012   | 3.018   | 3.007  | 3.011   | 3.016   | 3.022   | 3.010  | 3.014   | 3.019   | 3.025   |
|                          | r                                 | 0.901  | 0.906   | 0.910   | 0.917   | 0.904  | 0.909   | 0.913   | 0.921   | 0.908  | 0.911   | 0.917   | 0.924   |
|                          | sd                                | 0.189  | 0.193   | 0.198   | 0.204   | 0.191  | 0.196   | 0.202   | 0.210   | 0.194  | 0.199   | 0.207   | 0.215   |
| Particle diffusion       | $k_p$ ( $\text{min}^{-1}$ )       | 1.008  | 1.012   | 1.017   | 1.022   | 1.011  | 1.015   | 1.020   | 1.026   | 1.014  | 1.018   | 1.024   | 1.030   |
|                          | r                                 | 0.803  | 0.808   | 0.813   | 0.816   | 0.807  | 0.811   | 0.816   | 0.822   | 0.810  | 0.813   | 0.819   | 0.825   |
|                          | sd                                | 0.397  | 0.401   | 0.404   | 0.408   | 0.399  | 0.402   | 0.407   | 0.412   | 0.400  | 0.405   | 0.410   | 0.416   |
| Intra particle diffusion | $k_i$ ( $\text{mg/g min}^{0.5}$ ) | 3.045  | 3.052   | 3.058   | 3.064   | 3.049  | 3.054   | 3.060   | 3.069   | 3.052  | 3.059   | 3.065   | 3.074   |
|                          | r                                 | 0.908  | 0.912   | 0.919   | 0.923   | 0.911  | 0.916   | 0.920   | 0.926   | 0.914  | 0.919   | 0.924   | 0.931   |
|                          | sd                                | 0.184  | 0.189   | 0.194   | 0.201   | 0.188  | 0.192   | 0.197   | 0.206   | 0.190  | 0.196   | 0.201   | 0.210   |

**Table S2.** Kinetic studies of PAMC composite for fluoride adsorption.

| Kinetic models           | Parameters                       | 303 K  |         |         |         | 313 K  |         |         |         | 323 K  |         |         |         |
|--------------------------|----------------------------------|--------|---------|---------|---------|--------|---------|---------|---------|--------|---------|---------|---------|
|                          |                                  | 8 mg/L | 10 mg/L | 12 mg/L | 14 mg/L | 8 mg/L | 10 mg/L | 12 mg/L | 14 mg/L | 8 mg/L | 10 mg/L | 12 mg/L | 14 mg/L |
| Pseudo-first-order       | $k_{ad}$ (min <sup>-1</sup> )    | 0.411  | 0.417   | 0.422   | 0.428   | 0.415  | 0.419   | 0.423   | 0.432   | 0.418  | 0.421   | 0.427   | 0.436   |
|                          | r                                | 0.718  | 0.724   | 0.730   | 0.736   | 0.722  | 0.728   | 0.735   | 0.742   | 0.726  | 0.732   | 0.739   | 0.746   |
|                          | sd                               | 0.319  | 0.324   | 0.329   | 0.333   | 0.321  | 0.328   | 0.331   | 0.337   | 0.325  | 0.330   | 0.335   | 0.341   |
| Pseudo-second-order      | $q_e$ (mg/g)                     | 4.447  | 4.452   | 4.458   | 4.463   | 4.450  | 4.455   | 4.461   | 4.467   | 4.454  | 4.459   | 4.465   | 4.473   |
|                          | k (g/mg min <sup>-1</sup> )      | 0.298  | 0.301   | 0.306   | 0.312   | 0.300  | 0.303   | 0.310   | 0.316   | 0.302  | 0.308   | 0.313   | 0.321   |
|                          | h (mg/g min <sup>-1</sup> )      | 2.964  | 2.970   | 2.976   | 2.981   | 2.967  | 2.974   | 2.979   | 2.985   | 2.971  | 2.978   | 2.983   | 2.992   |
|                          | r                                | 0.907  | 0.914   | 0.920   | 0.925   | 0.912  | 0.918   | 0.924   | 0.932   | 0.917  | 0.922   | 0.928   | 0.935   |
| Particle diffusion       | sd                               | 0.176  | 0.182   | 0.187   | 0.193   | 0.179  | 0.183   | 0.189   | 0.198   | 0.181  | 0.186   | 0.194   | 0.203   |
|                          | $k_p$ (min <sup>-1</sup> )       | 1.002  | 1.007   | 1.011   | 1.016   | 1.005  | 1.012   | 1.016   | 1.021   | 1.009  | 1.013   | 1.018   | 1.022   |
|                          | r                                | 0.829  | 0.834   | 0.839   | 0.843   | 0.832  | 0.837   | 0.841   | 0.848   | 0.836  | 0.840   | 0.845   | 0.852   |
| Intra particle diffusion | sd                               | 0.371  | 0.377   | 0.381   | 0.385   | 0.376  | 0.379   | 0.383   | 0.389   | 0.377  | 0.382   | 0.386   | 0.391   |
|                          | $k_i$ (mg/g min <sup>0.5</sup> ) | 3.008  | 3.013   | 3.019   | 3.024   | 3.011  | 3.017   | 3.022   | 3.027   | 3.015  | 3.021   | 3.025   | 3.032   |
|                          | r                                | 0.914  | 0.919   | 0.924   | 0.930   | 0.917  | 0.923   | 0.927   | 0.935   | 0.921  | 0.924   | 0.930   | 0.941   |
|                          | sd                               | 0.168  | 0.173   | 0.179   | 0.183   | 0.171  | 0.176   | 0.182   | 0.188   | 0.174  | 0.180   | 0.186   | 0.192   |
